# Supplementary material
Source: bioRxiv or medRxiv preprint supplement (https://medrxiv.org/highwire/filestream/80310/field_highwire_adjunct_files/0/2020.05.07.20093955-1.pdf)
Supplement: Supplementary file [file 2020.05.07.20093955-1.pdf]

# Utility and limitations of Google searches on sensory loss as markers for new COVID-19 cases

## Supplementary Figure S1

Supplementary Figure S1 repeats the calculation presented in Figure 1, for the last week of April. This clearly illustrates the current lack of correlation between the number of new cases in each region (Italy) or state (US) and the popularity of searches on either taste or smell loss.

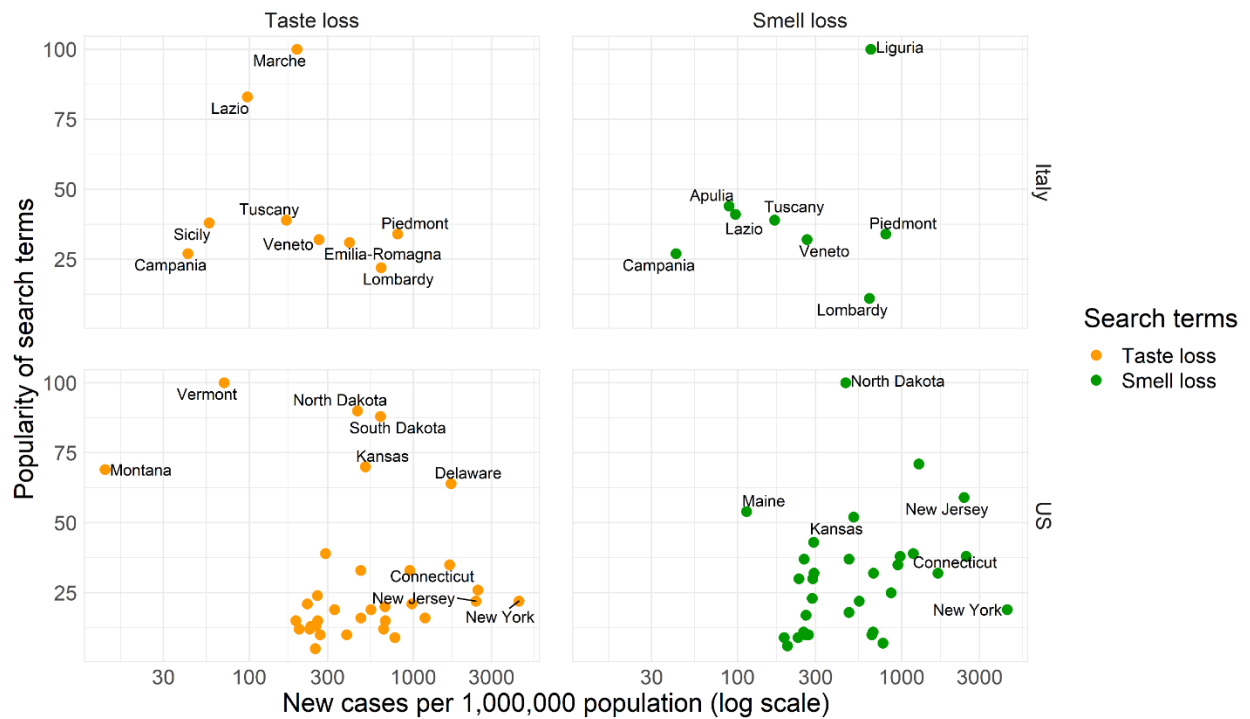

**Figure S1:** Last analyzed week, 22-28 April. Graphs describe the regions/states and include the taste loss (in orange) and smell loss (in green) search queries. Each point represents a different region/state. Normalized number of new cases related to the corresponding week on the x axis, popularity of the search terms on the y axis. For both graphs, not all the regions or states are shown because of the lack of popularity index for some of these geographical sub-areas.
